# Supplementary material for: Analysis of the Proteins Secreted from the Oryza meyeriana Suspension-Cultured Cells Induced by Xanthomonas oryzae pv. oryzae
Source: PubMed Central journal article supplement (PMC4873123; doi:10.1371/journal.pone.0154793), 2016-05-19
Supplement: pone.0154793.s001.pdf [file pone.0154793.s001.pdf]

## A: Resistance rice-*Xoo*

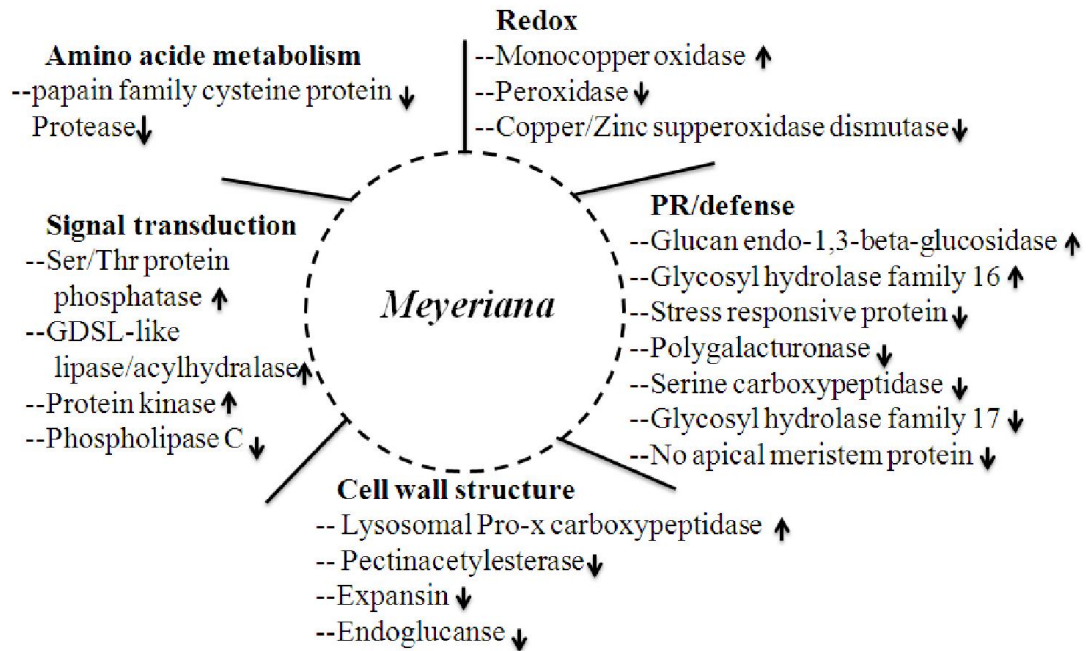

## B: Susceptible rice-*Xoo*

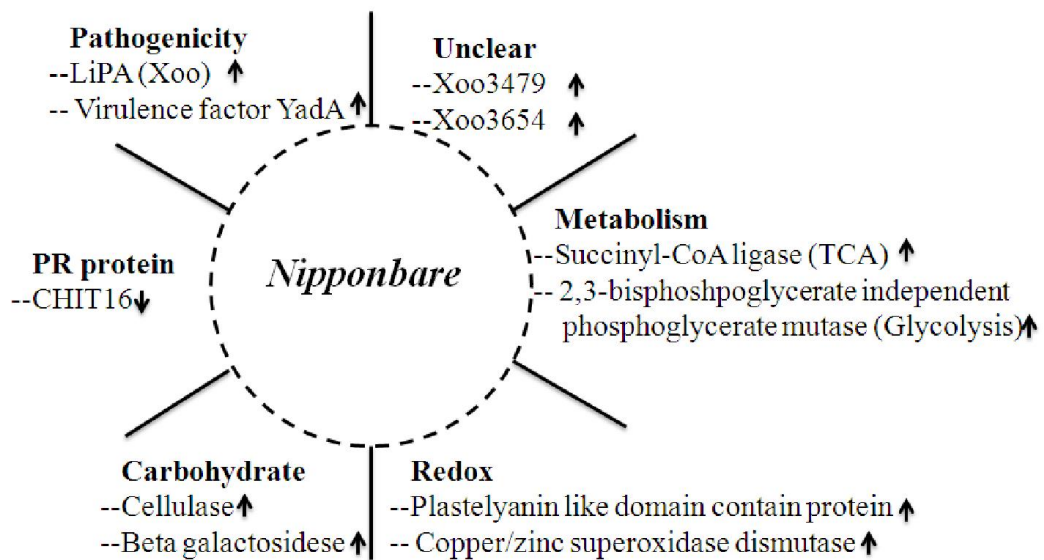

**S1 Fig.** Classification of *Xoo*-responsive proteins in *O. meyeriana* and susceptible rice. A: classification of *Xoo*-responsive proteins in Meyeriana; B: *Xoo*- responsive proteins in Nipponbare (Susceptible rice) [73]. ↑: up regulated protein; ↓:down regulated protein.
