# Supplementary material for: Analysis of the Proteins Secreted from the Oryza meyeriana Suspension-Cultured Cells Induced by Xanthomonas oryzae pv. oryzae
Source: PubMed Central journal article supplement (PMC4873123; doi:10.1371/journal.pone.0154793), 2016-05-19
Supplement: pone.0154793.s002.pdf [file pone.0154793.s002.pdf]

**S1 Table.** Primers used for QRT-PCR to detect the mRNA of secreted proteins from *Oryza meyeriana*

| Spot No | NCBI Accession number | Sequence (5'-3')           | Product size (bp) |
|---------|-----------------------|----------------------------|-------------------|
| 4       | Os06g01490.1          | F: GATGGAGGCTATAATGTCACT   | 123               |
|         |                       | R: CAGAGGATGATGAACTTGATG   |                   |
| 8       | Os11g47820.2          | F: CCGAATCCATCACCTAACC     | 131               |
|         |                       | R: CAGTCCACATAGCCACAG      |                   |
| 10      | Os11g05760.1          | F: CGGCGGAATACTGAAGAG      | 139               |
|         |                       | R: GATTCTCATCTCCTGTCTCC    |                   |
| 11      | Os12g17910            | F: ACAATGCTGGAGTGGAAG      | 108               |
|         |                       | R: CCGCCTCAATCAAGTTCT      |                   |
| 18      | Os12g44020.1          | F: GTTCTGGTACTCCGTCAAG     | 189               |
|         |                       | R: TAGTGGTAGTTGTTGCTGTT    |                   |
| 27      | Os01g66830.1          | F: ACGCCATTCAACATCTCAT     | 134               |
|         |                       | R: TTACAAGGATACTCGCAGTC    |                   |
| 30      | Os09g02729.1          | F: TGTAGAGAATGAAGCGTGT     | 198               |
|         |                       | R: CAAGCAGCAATGGTGTG       |                   |
| 40      | Os04g51460.1          | F: GGCAAAGAGCAGCAGTTC      | 129               |
|         |                       | R: GCGTGGTTCTTCATCTCC      |                   |
| 42      | Os02g42310.1          | F: ATCAGCAGGTTGGAGGAT      | 148               |
|         |                       | R: GTCGGAGGCATCTTCTTG      |                   |
| 43      | Os05g44200.1          | F: CTTCACCTACATCAACATCTAC  | 117               |
|         |                       | R: ACCTGACCGTTGTTCTC       |                   |
| 55      | Os05g24550.1          | F: GGATGCGAACCTGCTTAT      | 141               |
|         |                       | R: GTAGACCTCTGCCATTATGT    |                   |
| 76      | Os08g42580.1          | F: ATGCCTCCAGAGTATGCT      | 127               |
|         |                       | R: CACTTGAAGATTCGGTTGAT    |                   |
| 99      | Os07g46990.1/2        | F: ACCACACTTCAATCCTACT     | 265               |
|         |                       | R: ATGATCCGCAAGCAACT       |                   |
| 101     | Os11g09280.1/2        | F: GTTGTGGTCGCTGATAACG     | 121               |
|         |                       | R: GCTGCCTCATCCAAGATT      |                   |
| Actin   | Os11g06390.1          | F: GAGTATGATGAGTCGGGTCCAG  | 122               |
|         |                       | R: ACACCAACAATCCCAAACAGAG' |                   |
