# Supplementary material for: Analysis of the Proteins Secreted from the Oryza meyeriana Suspension-Cultured Cells Induced by Xanthomonas oryzae pv. oryzae
Source: PubMed Central journal article supplement (PMC4873123; doi:10.1371/journal.pone.0154793), 2016-05-19
Supplement: pone.0154793.s003.pdf [file pone.0154793.s003.pdf]

**S2 Table .** Primers used for QRT-PCR to detect the mRNA of peroxidases of *Oryza meyeriana*

| <b>Spot No</b> | <b>Protein name</b> | <b>RGAP Accession number</b> | <b>Sequence (5'-3')</b>  | <b>Product size (bp)</b> |
|----------------|---------------------|------------------------------|--------------------------|--------------------------|
| M52            | Peroxidase 4        | Os07g0677100-01              | ACGCCCTACTCCTTCGACAACGC  | 168                      |
|                |                     |                              | AAGCCTGATCTGTCCCTGGCTCCC |                          |
| M111           | Peroxidase 5        | Os07g0665200-01              | GACCTCTGTGACGGGAAGTGTCT  | 189                      |
|                |                     |                              | CATGGCGGTTCTCATCTTGTGG   |                          |
| Mock           | Actin               | Os11g06390.1                 | GAGTATGATGAGTCGGGTCCAG   | 125                      |
|                |                     |                              | ACACCAACAATCCCAAACAGAG'  |                          |
